# Supplementary material for: Exploratory analyses of the associations between Ki-67 expression, lymph node metastasis, and prognosis in patients with esophageal squamous cell cancer
Source: PeerJ. 2025 Feb 26;13:e19062. doi: 10.7717/peerj.19062 (PMC11871893; doi:10.7717/peerj.19062)
Supplement: Table S1 [file peerj-13-19062-s001.xlsx]

## Sheet: Sheet 1
Supplementary Table S1. The panoramic data of the patients included in the study.
ID	Futime.OS	Fustat.OS	Tstage	Nstage	Mstage	Stage	MKI67	MKI67Status	Coloring strength	Positive percentage	Gene Score	Vascular Invasion	Perineural Invasion	PostTreatment	Gender	Age	Age Group	Tumor Location	Differentiation
1	23	1	T2	N2	M0	Stage III	HighExpression	Strong positive	3	3	9	Negative	Negative	No	Male	69	Elderly group	Upper thoracic	G2
2	47	0	T2	N0	M0	Stage II	LowExpression	Weakly positive	1	2	2	Positive	Negative	Yes	Male	64	Elderly group	Lower thoracic	G1
3	34	1	T2	N2	M0	Stage III	HighExpression	Positive	2	3	6	Negative	Negative	Yes	Male	55	Young group	Mid thoracic	G1
4	45	0	T1	N1	M0	Stage I	HighExpression	Positive	2	4	8	Positive	Negative	Yes	Female	62	Elderly group	Upper thoracic	G1
5	17	1	T2	N2	M0	Stage III	HighExpression	Strong positive	3	4	12	Negative	Negative	No	Female	61	Elderly group	Lower thoracic	G2
6	60	1	T2	N0	M0	Stage II	LowExpression	Weakly positive	1	1	1	Positive	Negative	Yes	Female	50	Young group	Upper thoracic	G2
7	23	1	T2	N2	M0	Stage III	LowExpression	Weakly positive	1	1	1	Positive	Negative	Yes	Female	52	Young group	Upper thoracic	G3
8	37	1	T2	N0	M0	Stage II	HighExpression	Positive	2	4	8	Negative	Negative	Yes	Male	45	Young group	Upper thoracic	G2
9	60	1	T3	N0	M0	Stage II	HighExpression	Strong positive	3	4	12	Positive	Positive	Yes	Male	60	Elderly group	Mid thoracic	G2
10	3	1	T3	N2	M0	Stage III	LowExpression	Weakly positive	2	2	4	Negative	Negative	Yes	Female	44	Young group	Lower thoracic	G3
11	60	0	T1	N1	M0	Stage I	LowExpression	Weakly positive	2	2	4	Negative	Negative	Yes	Female	63	Elderly group	Mid thoracic	G1
12	13	1	T2	N3	M0	Stage IV	HighExpression	Strong positive	3	3	9	Negative	Negative	No	Male	59	Young group	Mid thoracic	G2
13	60	0	T1	N1	M0	Stage I	LowExpression	Weakly positive	1	1	1	Negative	Negative	Yes	Male	60	Elderly group	Mid thoracic	G1
14	47	1	T2	N1	M0	Stage II	HighExpression	Positive	2	4	8	Negative	Positive	Yes	Female	59	Young group	Lower thoracic	G1
15	15	1	T2	N3	M0	Stage IV	HighExpression	Positive	2	3	6	Positive	Negative	No	Female	51	Young group	Lower thoracic	G3
16	24	1	T2	N2	M0	Stage III	HighExpression	Positive	2	4	8	Positive	Positive	Yes	Female	58	Young group	Mid thoracic	G3
17	60	0	T1	N0	M0	Stage I	LowExpression	Weakly positive	2	2	4	Positive	Negative	Yes	Male	72	Elderly group	Mid thoracic	G2
18	31	0	T1	N1	M0	Stage I	LowExpression	Weakly positive	2	2	4	Negative	Negative	Yes	Female	46	Young group	Mid thoracic	G1
19	60	0	T1	N1	M0	Stage I	HighExpression	Strong positive	3	4	12	Negative	Negative	Yes	Female	50	Young group	Mid thoracic	G3
20	31	1	T3	N1	M0	Stage III	HighExpression	Positive	2	3	6	Negative	Negative	Yes	Male	55	Young group	Upper thoracic	G2
21	60	0	T2	N1	M0	Stage II	LowExpression	Weakly positive	1	3	3	Positive	Negative	Yes	Male	51	Young group	Mid thoracic	G1
22	34	1	T2	N2	M0	Stage III	HighExpression	Strong positive	3	4	12	Positive	Positive	No	Female	68	Elderly group	Lower thoracic	G3
23	7	1	T2	N2	M0	Stage III	HighExpression	Strong positive	3	3	9	Positive	Positive	No	Male	63	Elderly group	Mid thoracic	G2
24	60	0	T1	N1	M0	Stage I	LowExpression	Weakly positive	2	2	4	Negative	Negative	Yes	Male	50	Young group	Mid thoracic	G1
25	18	1	T2	N1	M0	Stage II	HighExpression	Strong positive	3	4	12	Negative	Positive	Yes	Male	49	Young group	Mid thoracic	G3
26	12	1	T2	N3	M0	Stage IV	HighExpression	Positive	2	4	8	Negative	Positive	No	Male	51	Young group	Upper thoracic	G2
27	17	0	T3	N1	M0	Stage III	LowExpression	Weakly positive	2	2	4	Negative	Negative	No	Female	56	Young group	Lower thoracic	G2
28	60	0	T2	N0	M0	Stage II	LowExpression	Weakly positive	2	2	4	Positive	Negative	Yes	Female	54	Young group	Mid thoracic	G1
29	31	0	T1	N1	M0	Stage I	HighExpression	Strong positive	3	3	9	Negative	Negative	Yes	Female	55	Young group	Lower thoracic	G1
30	50	0	T1	N1	M0	Stage I	LowExpression	Weakly positive	1	1	1	Negative	Negative	Yes	Male	68	Elderly group	Lower thoracic	G2
31	59	1	T2	N2	M0	Stage III	HighExpression	Strong positive	3	3	9	Negative	Negative	Yes	Female	66	Elderly group	Mid thoracic	G2
32	18	1	T2	N1	M0	Stage II	LowExpression	Weakly positive	1	2	2	Negative	Positive	No	Male	55	Young group	Mid thoracic	G1
33	25	1	T3	N1	M0	Stage III	LowExpression	Weakly positive	1	1	1	Positive	Positive	Yes	Male	68	Elderly group	Mid thoracic	G1
34	21	1	T3	N2	M0	Stage III	LowExpression	Weakly positive	2	2	4	Negative	Positive	No	Male	47	Young group	Mid thoracic	G2
35	23	1	T2	N0	M0	Stage II	HighExpression	Positive	2	3	6	Negative	Positive	Yes	Male	51	Young group	Mid thoracic	G1
36	8	1	T1	N2	M0	Stage III	HighExpression	Positive	2	4	8	Negative	Negative	No	Male	52	Young group	Mid thoracic	G1
37	21	1	T2	N1	M0	Stage II	HighExpression	Strong positive	3	3	9	Positive	Negative	Yes	Female	60	Elderly group	Lower thoracic	G1
38	35	0	T2	N2	M0	Stage III	LowExpression	Weakly positive	2	2	4	Negative	Negative	No	Male	45	Young group	Mid thoracic	G3
39	16	1	T1	N1	M0	Stage I	HighExpression	Positive	2	3	6	Negative	Negative	Yes	Male	61	Elderly group	Mid thoracic	G1
40	55	0	T1	N0	M0	Stage I	LowExpression	Weakly positive	1	3	3	Negative	Negative	Yes	Female	55	Young group	Lower thoracic	G2
41	34	1	T2	N1	M0	Stage II	HighExpression	Strong positive	3	3	9	Negative	Negative	Yes	Male	64	Elderly group	Mid thoracic	G1
42	29	1	T2	N0	M0	Stage II	HighExpression	Positive	2	4	8	Positive	Negative	No	Female	55	Young group	Mid thoracic	G1
43	22	0	T3	N0	M0	Stage II	LowExpression	Weakly positive	2	2	4	Negative	Negative	No	Male	62	Elderly group	Lower thoracic	G1
44	23	1	T2	N1	M0	Stage II	HighExpression	Strong positive	3	4	12	Positive	Positive	Yes	Male	47	Young group	Upper thoracic	G1
45	54	1	T3	N1	M0	Stage III	HighExpression	Positive	2	4	8	Negative	Negative	No	Female	49	Young group	Mid thoracic	G3
46	18	1	T3	N3	M0	Stage IV	LowExpression	Weakly positive	1	1	1	Negative	Positive	No	Male	66	Elderly group	Mid thoracic	G2
47	19	1	T2	N3	M0	Stage IV	HighExpression	Positive	2	4	8	Negative	Positive	No	Female	54	Young group	Upper thoracic	G2
48	37	1	T1	N2	M0	Stage III	LowExpression	Weakly positive	1	2	2	Positive	Negative	No	Female	70	Elderly group	Upper thoracic	G2
49	60	0	T3	N0	M0	Stage II	HighExpression	Positive	2	4	8	Negative	Negative	Yes	Male	53	Young group	Lower thoracic	G3
50	11	1	T3	N2	M0	Stage III	HighExpression	Strong positive	3	4	12	Positive	Negative	Yes	Male	55	Young group	Mid thoracic	G3
51	7	1	T2	N1	M0	Stage II	HighExpression	Strong positive	3	3	9	Positive	Positive	Yes	Male	55	Young group	Upper thoracic	G2
52	14	0	T2	N1	M0	Stage II	LowExpression	Weakly positive	1	1	1	Negative	Positive	Yes	Male	68	Elderly group	Lower thoracic	G1
53	17	1	T2	N2	M0	Stage III	HighExpression	Strong positive	3	3	9	Positive	Positive	No	Male	71	Elderly group	Mid thoracic	G1
54	21	1	T2	N0	M0	Stage II	LowExpression	Weakly positive	2	2	4	Negative	Positive	Yes	Female	55	Young group	Lower thoracic	G2
55	60	0	T1	N1	M0	Stage I	LowExpression	Weakly positive	1	3	3	Negative	Negative	Yes	Male	57	Young group	Lower thoracic	G1
56	12	1	T3	N1	M0	Stage III	HighExpression	Strong positive	3	3	9	Positive	Positive	No	Male	58	Young group	Lower thoracic	G3
57	25	1	T2	N3	M0	Stage IV	HighExpression	Strong positive	3	4	12	Positive	Positive	No	Male	73	Elderly group	Mid thoracic	G3
58	14	0	T2	N2	M0	Stage III	LowExpression	Weakly positive	2	2	4	Negative	Negative	No	Female	68	Elderly group	Lower thoracic	G3
59	60	0	T1	N0	M0	Stage I	LowExpression	Weakly positive	1	2	2	Negative	Negative	Yes	Female	59	Young group	Mid thoracic	G1
60	60	0	T2	N0	M0	Stage II	LowExpression	Weakly positive	1	2	2	Positive	Negative	Yes	Male	54	Young group	Mid thoracic	G1
61	60	0	T1	N0	M0	Stage I	LowExpression	Weakly positive	1	3	3	Negative	Negative	Yes	Female	51	Young group	Mid thoracic	G1
62	59	1	T2	N1	M0	Stage II	HighExpression	Positive	2	3	6	Negative	Negative	No	Female	43	Young group	Mid thoracic	G1
63	48	1	T3	N2	M0	Stage III	HighExpression	Positive	2	3	6	Positive	Negative	Yes	Female	49	Young group	Upper thoracic	G1
64	41	0	T2	N1	M0	Stage II	LowExpression	Weakly positive	1	3	3	Negative	Negative	Yes	Female	65	Elderly group	Mid thoracic	G3
65	18	0	T1	N0	M0	Stage I	LowExpression	Weakly positive	1	1	1	Negative	Negative	Yes	Male	65	Elderly group	Mid thoracic	G1
66	21	1	T1	N1	M0	Stage I	HighExpression	Positive	2	3	6	Negative	Negative	Yes	Male	68	Elderly group	Mid thoracic	G1
67	34	1	T1	N2	M0	Stage III	HighExpression	Positive	2	4	8	Negative	Negative	Yes	Male	52	Young group	Lower thoracic	G3
68	24	0	T1	N2	M0	Stage III	HighExpression	Strong positive	3	4	12	Positive	Negative	No	Male	65	Elderly group	Mid thoracic	G3
69	35	1	T1	N0	M0	Stage I	LowExpression	Weakly positive	1	3	3	Negative	Positive	Yes	Female	50	Young group	Lower thoracic	G2
70	46	0	T2	N0	M0	Stage II	LowExpression	Weakly positive	1	2	2	Negative	Negative	Yes	Female	53	Young group	Mid thoracic	G1
71	45	0	T2	N0	M0	Stage II	HighExpression	Positive	2	4	8	Positive	Negative	Yes	Male	46	Young group	Mid thoracic	G1
72	35	1	T3	N2	M0	Stage III	HighExpression	Strong positive	3	4	12	Negative	Positive	No	Female	60	Elderly group	Upper thoracic	G3
73	32	1	T2	N0	M0	Stage II	HighExpression	Positive	2	4	8	Positive	Positive	Yes	Female	46	Young group	Lower thoracic	G2
74	30	1	T1	N2	M0	Stage III	HighExpression	Positive	2	3	6	Positive	Positive	No	Female	53	Young group	Lower thoracic	G2
75	59	0	T1	N0	M0	Stage I	HighExpression	Strong positive	3	4	12	Positive	Negative	Yes	Female	53	Young group	Upper thoracic	G1
76	39	1	T1	N1	M0	Stage I	LowExpression	Weakly positive	1	2	2	Positive	Negative	Yes	Female	74	Elderly group	Mid thoracic	G1
77	23	1	T2	N2	M0	Stage III	HighExpression	Strong positive	3	3	9	Negative	Positive	Yes	Male	65	Elderly group	Mid thoracic	G2
78	60	0	T1	N1	M0	Stage I	LowExpression	Weakly positive	1	3	3	Negative	Positive	Yes	Male	57	Young group	Mid thoracic	G1
79	36	1	T3	N2	M0	Stage III	HighExpression	Strong positive	3	3	9	Positive	Positive	No	Male	45	Young group	Lower thoracic	G2
80	29	1	T2	N1	M0	Stage II	HighExpression	Positive	2	3	6	Positive	Positive	Yes	Female	48	Young group	Lower thoracic	G2
81	54	1	T1	N2	M0	Stage III	LowExpression	Weakly positive	2	2	4	Negative	Negative	No	Female	50	Young group	Lower thoracic	G1
82	18	1	T2	N2	M0	Stage III	HighExpression	Positive	2	4	8	Negative	Negative	No	Female	51	Young group	Mid thoracic	G3
83	29	1	T3	N0	M0	Stage II	LowExpression	Weakly positive	1	2	2	Negative	Negative	Yes	Female	45	Young group	Lower thoracic	G1
84	36	1	T1	N0	M0	Stage I	LowExpression	Weakly positive	1	1	1	Negative	Negative	Yes	Female	50	Young group	Lower thoracic	G3
85	21	1	T3	N0	M0	Stage II	HighExpression	Strong positive	3	4	12	Negative	Positive	Yes	Female	54	Young group	Mid thoracic	G2
86	60	0	T2	N0	M0	Stage II	LowExpression	Weakly positive	1	1	1	Negative	Negative	Yes	Male	64	Elderly group	Lower thoracic	G2
87	25	1	T2	N1	M0	Stage II	HighExpression	Positive	2	3	6	Negative	Negative	Yes	Female	49	Young group	Lower thoracic	G2
88	25	1	T2	N2	M0	Stage III	HighExpression	Strong positive	3	4	12	Positive	Negative	No	Male	56	Young group	Mid thoracic	G3
89	3	1	T3	N0	M0	Stage II	HighExpression	Positive	2	4	8	Negative	Negative	No	Female	58	Young group	Mid thoracic	G1
90	9	1	T2	N2	M0	Stage III	HighExpression	Positive	2	4	8	Positive	Positive	Yes	Female	44	Young group	Lower thoracic	G3
91	25	1	T2	N3	M0	Stage IV	HighExpression	Strong positive	3	3	9	Negative	Negative	No	Male	51	Young group	Lower thoracic	G1
92	30	1	T2	N2	M0	Stage III	HighExpression	Positive	2	3	6	Positive	Positive	No	Male	55	Young group	Lower thoracic	G2
93	49	1	T2	N1	M0	Stage II	LowExpression	Weakly positive	1	1	1	Negative	Negative	Yes	Male	50	Young group	Upper thoracic	G2
94	20	0	T1	N0	M0	Stage I	LowExpression	Weakly positive	1	2	2	Negative	Negative	Yes	Female	60	Elderly group	Upper thoracic	G2
95	20	1	T2	N0	M0	Stage II	HighExpression	Positive	2	3	6	Negative	Negative	Yes	Male	55	Young group	Mid thoracic	G2
96	60	0	T2	N0	M0	Stage II	LowExpression	Weakly positive	2	2	4	Negative	Negative	Yes	Male	59	Young group	Mid thoracic	G2
97	56	0	T1	N1	M0	Stage I	HighExpression	Positive	2	4	8	Negative	Negative	Yes	Male	75	Elderly group	Mid thoracic	G2
98	3	1	T2	N2	M0	Stage III	HighExpression	Strong positive	3	4	12	Positive	Positive	No	Female	65	Elderly group	Mid thoracic	G2
99	44	0	T1	N0	M0	Stage I	LowExpression	Weakly positive	1	2	2	Negative	Negative	Yes	Female	56	Young group	Lower thoracic	G1
100	43	1	T3	N2	M0	Stage III	HighExpression	Strong positive	3	3	9	Positive	Positive	No	Male	62	Elderly group	Upper thoracic	G2
101	3	1	T2	N1	M0	Stage II	HighExpression	Positive	2	3	6	Negative	Negative	Yes	Female	60	Elderly group	Lower thoracic	G2
102	29	1	T2	N1	M0	Stage II	HighExpression	Positive	2	4	8	Positive	Positive	Yes	Male	60	Elderly group	Mid thoracic	G2
103	9	1	T2	N2	M0	Stage III	LowExpression	Weakly positive	2	2	4	Negative	Negative	No	Male	49	Young group	Mid thoracic	G2
104	24	0	T2	N1	M0	Stage II	LowExpression	Weakly positive	2	2	4	Negative	Negative	Yes	Male	63	Elderly group	Upper thoracic	G2
105	33	0	T2	N2	M0	Stage III	LowExpression	Weakly positive	1	2	2	Positive	Negative	Yes	Male	54	Young group	Mid thoracic	G2
106	25	1	T2	N3	M0	Stage IV	HighExpression	Positive	2	4	8	Positive	Negative	No	Male	56	Young group	Lower thoracic	G1
107	7	0	T2	N2	M0	Stage III	LowExpression	Weakly positive	1	3	3	Positive	Negative	No	Male	56	Young group	Mid thoracic	G2
108	38	0	T1	N2	M0	Stage III	LowExpression	Weakly positive	1	2	2	Negative	Negative	No	Male	51	Young group	Mid thoracic	G2
109	60	0	T1	N0	M0	Stage I	HighExpression	Strong positive	3	3	9	Negative	Negative	Yes	Male	63	Elderly group	Lower thoracic	G2
110	53	0	T2	N1	M0	Stage II	LowExpression	Weakly positive	1	3	3	Negative	Negative	Yes	Male	58	Young group	Lower thoracic	G2
111	60	0	T2	N1	M0	Stage II	LowExpression	Weakly positive	1	1	1	Negative	Negative	Yes	Female	62	Elderly group	Mid thoracic	G2
112	39	1	T2	N3	M0	Stage IV	HighExpression	Positive	2	3	6	Negative	Negative	No	Female	73	Elderly group	Upper thoracic	G2
113	26	0	T2	N0	M0	Stage II	HighExpression	Strong positive	3	4	12	Positive	Positive	Yes	Male	48	Young group	Upper thoracic	G1
114	25	1	T2	N2	M0	Stage III	LowExpression	Weakly positive	2	2	4	Positive	Positive	No	Male	61	Elderly group	Mid thoracic	G1
115	41	1	T2	N1	M0	Stage II	HighExpression	Positive	2	3	6	Positive	Positive	Yes	Female	69	Elderly group	Mid thoracic	G1
116	36	1	T2	N2	M0	Stage III	HighExpression	Positive	2	3	6	Positive	Positive	No	Male	57	Young group	Lower thoracic	G2
117	60	0	T2	N0	M0	Stage II	LowExpression	Weakly positive	2	2	4	Negative	Negative	No	Male	56	Young group	Mid thoracic	G1
118	35	1	T1	N0	M0	Stage I	LowExpression	Weakly positive	2	2	4	Positive	Positive	Yes	Male	61	Elderly group	Mid thoracic	G2
119	31	1	T3	N2	M0	Stage III	HighExpression	Positive	2	4	8	Positive	Positive	No	Male	44	Young group	Lower thoracic	G2
120	44	1	T1	N2	M0	Stage III	LowExpression	Weakly positive	1	1	1	Negative	Positive	No	Female	73	Elderly group	Lower thoracic	G3
121	7	1	T3	N1	M0	Stage III	HighExpression	Positive	2	3	6	Positive	Positive	No	Male	61	Elderly group	Mid thoracic	G2
122	12	1	T3	N3	M0	Stage IV	HighExpression	Positive	2	4	8	Negative	Negative	No	Male	59	Young group	Upper thoracic	G3
123	11	1	T3	N1	M0	Stage III	HighExpression	Positive	2	4	8	Negative	Negative	No	Male	61	Elderly group	Mid thoracic	G2
124	60	0	T1	N0	M0	Stage I	LowExpression	Weakly positive	1	3	3	Negative	Positive	Yes	Male	67	Elderly group	Lower thoracic	G2
125	17	1	T1	N2	M0	Stage III	HighExpression	Strong positive	3	3	9	Negative	Positive	No	Female	57	Young group	Lower thoracic	G2
126	36	1	T3	N2	M0	Stage III	HighExpression	Strong positive	3	3	9	Positive	Positive	No	Male	52	Young group	Upper thoracic	G1
127	51	0	T1	N0	M0	Stage I	HighExpression	Strong positive	3	4	12	Negative	Positive	Yes	Male	52	Young group	Mid thoracic	G2
128	60	0	T1	N0	M0	Stage I	LowExpression	Weakly positive	1	2	2	Negative	Positive	Yes	Male	70	Elderly group	Lower thoracic	G3
129	20	1	T2	N2	M0	Stage III	HighExpression	Positive	2	3	6	Positive	Positive	Yes	Male	61	Elderly group	Upper thoracic	G2
130	28	1	T2	N1	M0	Stage II	HighExpression	Strong positive	3	3	9	Positive	Negative	Yes	Male	68	Elderly group	Upper thoracic	G1
131	57	0	T1	N2	M0	Stage III	LowExpression	Weakly positive	1	2	2	Negative	Negative	No	Male	44	Young group	Lower thoracic	G3
132	19	1	T2	N2	M0	Stage III	HighExpression	Strong positive	3	3	9	Negative	Negative	Yes	Female	67	Elderly group	Mid thoracic	G1
133	6	0	T1	N1	M0	Stage I	LowExpression	Weakly positive	1	2	2	Negative	Positive	Yes	Female	48	Young group	Lower thoracic	G2
134	60	0	T1	N2	M0	Stage III	LowExpression	Weakly positive	1	3	3	Negative	Positive	No	Male	49	Young group	Lower thoracic	G3
135	30	1	T1	N2	M0	Stage III	HighExpression	Positive	2	4	8	Negative	Negative	Yes	Male	65	Elderly group	Lower thoracic	G2
136	36	1	T2	N1	M0	Stage II	LowExpression	Weakly positive	1	1	1	Positive	Negative	No	Male	52	Young group	Mid thoracic	G3
137	60	0	T1	N1	M0	Stage I	HighExpression	Positive	2	3	6	Negative	Negative	Yes	Male	59	Young group	Mid thoracic	G1
138	4	1	T1	N1	M0	Stage I	HighExpression	Positive	2	4	8	Negative	Negative	Yes	Male	62	Elderly group	Mid thoracic	G1
139	12	1	T3	N3	M0	Stage IV	LowExpression	Weakly positive	2	2	4	Negative	Negative	No	Male	50	Young group	Lower thoracic	G3
140	60	0	T1	N2	M0	Stage III	HighExpression	Strong positive	3	4	12	Negative	Negative	No	Male	64	Elderly group	Lower thoracic	G2
141	60	0	T1	N2	M0	Stage III	HighExpression	Positive	2	4	8	Negative	Negative	No	Female	50	Young group	Upper thoracic	G2
142	52	1	T1	N1	M0	Stage I	HighExpression	Positive	2	4	8	Negative	Positive	Yes	Male	56	Young group	Lower thoracic	G3
143	44	0	T1	N2	M0	Stage III	LowExpression	Weakly positive	1	1	1	Negative	Negative	No	Female	54	Young group	Lower thoracic	G2
144	40	1	T2	N1	M0	Stage II	LowExpression	Weakly positive	1	1	1	Negative	Negative	Yes	Female	57	Young group	Mid thoracic	G2
145	51	1	T1	N2	M0	Stage III	LowExpression	Weakly positive	1	1	1	Positive	Positive	No	Female	47	Young group	Mid thoracic	G3
146	20	1	T1	N2	M0	Stage III	LowExpression	Weakly positive	2	2	4	Negative	Positive	No	Female	62	Elderly group	Mid thoracic	G2
147	44	1	T2	N1	M0	Stage II	LowExpression	Weakly positive	1	2	2	Positive	Negative	Yes	Male	52	Young group	Upper thoracic	G2
148	44	1	T3	N2	M0	Stage III	LowExpression	Weakly positive	1	2	2	Negative	Negative	No	Female	60	Elderly group	Upper thoracic	G2
149	60	0	T2	N0	M0	Stage II	LowExpression	Weakly positive	1	1	1	Negative	Negative	Yes	Male	60	Elderly group	Lower thoracic	G1
150	20	0	T2	N1	M0	Stage II	LowExpression	Weakly positive	1	3	3	Negative	Positive	No	Female	61	Elderly group	Mid thoracic	G1
151	10	1	T1	N0	M0	Stage I	HighExpression	Positive	2	3	6	Negative	Positive	Yes	Female	57	Young group	Lower thoracic	G1
152	42	0	T1	N0	M0	Stage I	HighExpression	Positive	2	4	8	Negative	Negative	Yes	Male	50	Young group	Mid thoracic	G3
153	5	1	T2	N1	M0	Stage II	HighExpression	Positive	2	3	6	Positive	Positive	Yes	Male	60	Elderly group	Mid thoracic	G2
154	60	0	T1	N1	M0	Stage I	LowExpression	Weakly positive	1	2	2	Negative	Negative	Yes	Male	53	Young group	Mid thoracic	G1
155	33	1	T3	N1	M0	Stage III	HighExpression	Strong positive	3	3	9	Positive	Positive	Yes	Male	51	Young group	Lower thoracic	G2
156	29	0	T2	N0	M0	Stage II	LowExpression	Weakly positive	1	3	3	Negative	Negative	Yes	Male	46	Young group	Lower thoracic	G1
157	3	1	T3	N1	M0	Stage III	HighExpression	Strong positive	3	3	9	Negative	Positive	No	Male	70	Elderly group	Lower thoracic	G2
158	56	1	T1	N1	M0	Stage I	LowExpression	Weakly positive	2	2	4	Negative	Negative	Yes	Female	68	Elderly group	Mid thoracic	G1
159	21	0	T3	N2	M0	Stage III	HighExpression	Positive	2	3	6	Negative	Negative	No	Male	63	Elderly group	Mid thoracic	G2
160	60	0	T2	N0	M0	Stage II	LowExpression	Weakly positive	1	3	3	Positive	Negative	Yes	Female	56	Young group	Mid thoracic	G2
161	43	1	T2	N0	M0	Stage II	HighExpression	Strong positive	3	3	9	Positive	Positive	Yes	Female	47	Young group	Lower thoracic	G2
162	37	1	T2	N2	M0	Stage III	HighExpression	Strong positive	3	4	12	Negative	Negative	No	Female	48	Young group	Lower thoracic	G2
163	45	1	T1	N0	M0	Stage I	LowExpression	Weakly positive	1	1	1	Negative	Negative	Yes	Female	70	Elderly group	Lower thoracic	G1
164	41	1	T1	N3	M0	Stage IV	HighExpression	Strong positive	3	4	12	Negative	Negative	No	Female	46	Young group	Lower thoracic	G3
165	60	0	T2	N1	M0	Stage II	LowExpression	Weakly positive	1	3	3	Negative	Negative	Yes	Male	57	Young group	Upper thoracic	G3
166	32	1	T3	N1	M0	Stage III	LowExpression	Weakly positive	2	2	4	Positive	Negative	No	Male	67	Elderly group	Mid thoracic	G1
167	42	1	T2	N2	M0	Stage III	HighExpression	Positive	2	3	6	Positive	Positive	No	Male	66	Elderly group	Mid thoracic	G3
168	21	1	T1	N2	M0	Stage III	HighExpression	Strong positive	3	3	9	Negative	Positive	Yes	Male	56	Young group	Mid thoracic	G2
