# Supplementary material for: Exploratory analyses of the associations between Ki-67 expression, lymph node metastasis, and prognosis in patients with esophageal squamous cell cancer
Source: PeerJ. 2025 Feb 26;13:e19062. doi: 10.7717/peerj.19062 (PMC11871893; doi:10.7717/peerj.19062)
Supplement: Table S2 [file peerj-13-19062-s002.xlsx]

## Sheet: Sheet 1
Supplementary Table S2. The panoramic data of the patients included in the study(Propensity matching analysis cohort).
ID	Futime.OS	Fustat.OS	Tstage	Nstage	Mstage	Stage	MKI67	MKI67Status	Coloring strength	Positive percentage	Gene Score	Vascular Invasion	Perineural Invasion	PostTreatment	Gender	Age	Age Group	Tumor Location	Differentiation	distance	weights	subclass
2	47	0	T2	N0	M0	Stage II	LowExpression	Weakly positive	1	2	2	Positive	Negative	Yes	Male	64	Elderly group	Lower thoracic	G1	0.495138	1	33
5	17	1	T2	N2	M0	Stage III	HighExpression	Strong positive	3	4	12	Negative	Negative	No	Female	61	Elderly group	Lower thoracic	G2	0.581645	1	34
6	60	1	T2	N0	M0	Stage II	LowExpression	Weakly positive	1	1	1	Positive	Negative	Yes	Female	50	Young group	Upper thoracic	G2	0.578174	1	34
7	23	1	T2	N2	M0	Stage III	LowExpression	Weakly positive	1	1	1	Positive	Negative	Yes	Female	52	Young group	Upper thoracic	G3	0.787748	1	37
8	37	1	T2	N0	M0	Stage II	HighExpression	Positive	2	4	8	Negative	Negative	Yes	Male	45	Young group	Upper thoracic	G2	0.623882	1	43
10	3	1	T3	N2	M0	Stage III	LowExpression	Weakly positive	2	2	4	Negative	Negative	Yes	Female	44	Young group	Lower thoracic	G3	0.70608	1	48
11	60	0	T1	N1	M0	Stage I	LowExpression	Weakly positive	2	2	4	Negative	Negative	Yes	Female	63	Elderly group	Mid thoracic	G1	0.337274	1	21
12	13	1	T2	N3	M0	Stage IV	HighExpression	Strong positive	3	3	9	Negative	Negative	No	Male	59	Young group	Mid thoracic	G2	0.839175	1	3
13	60	0	T1	N1	M0	Stage I	LowExpression	Weakly positive	1	1	1	Negative	Negative	Yes	Male	60	Elderly group	Mid thoracic	G1	0.381145	1	28
14	47	1	T2	N1	M0	Stage II	HighExpression	Positive	2	4	8	Negative	Positive	Yes	Female	59	Young group	Lower thoracic	G1	0.453954	1	11
17	60	0	T1	N0	M0	Stage I	LowExpression	Weakly positive	2	2	4	Positive	Negative	Yes	Male	72	Elderly group	Mid thoracic	G2	0.396592	1	52
19	60	0	T1	N1	M0	Stage I	HighExpression	Strong positive	3	4	12	Negative	Negative	Yes	Female	50	Young group	Mid thoracic	G3	0.333464	1	21
21	60	0	T2	N1	M0	Stage II	LowExpression	Weakly positive	1	3	3	Positive	Negative	Yes	Male	51	Young group	Mid thoracic	G1	0.516688	1	26
22	34	1	T2	N2	M0	Stage III	HighExpression	Strong positive	3	4	12	Positive	Positive	No	Female	68	Elderly group	Lower thoracic	G3	0.555252	1	22
23	7	1	T2	N2	M0	Stage III	HighExpression	Strong positive	3	3	9	Positive	Positive	No	Male	63	Elderly group	Mid thoracic	G2	0.641301	1	23
25	18	1	T2	N1	M0	Stage II	HighExpression	Strong positive	3	4	12	Negative	Positive	Yes	Male	49	Young group	Mid thoracic	G3	0.506041	1	24
27	17	0	T3	N1	M0	Stage III	LowExpression	Weakly positive	2	2	4	Negative	Negative	No	Female	56	Young group	Lower thoracic	G2	0.587841	1	41
28	60	0	T2	N0	M0	Stage II	LowExpression	Weakly positive	2	2	4	Positive	Negative	Yes	Female	54	Young group	Mid thoracic	G1	0.46904	1	47
29	31	0	T1	N1	M0	Stage I	HighExpression	Strong positive	3	3	9	Negative	Negative	Yes	Female	55	Young group	Lower thoracic	G1	0.329453	1	25
30	50	0	T1	N1	M0	Stage I	LowExpression	Weakly positive	1	1	1	Negative	Negative	Yes	Male	68	Elderly group	Lower thoracic	G2	0.382159	1	1
32	18	1	T2	N1	M0	Stage II	LowExpression	Weakly positive	1	2	2	Negative	Positive	No	Male	55	Young group	Mid thoracic	G1	0.363036	1	14
33	25	1	T3	N1	M0	Stage III	LowExpression	Weakly positive	1	1	1	Positive	Positive	Yes	Male	68	Elderly group	Mid thoracic	G1	0.758597	1	17
34	21	1	T3	N2	M0	Stage III	LowExpression	Weakly positive	2	2	4	Negative	Positive	No	Male	47	Young group	Mid thoracic	G2	0.64715	1	23
35	23	1	T2	N0	M0	Stage II	HighExpression	Positive	2	3	6	Negative	Positive	Yes	Male	51	Young group	Mid thoracic	G1	0.516688	1	26
37	21	1	T2	N1	M0	Stage II	HighExpression	Strong positive	3	3	9	Positive	Negative	Yes	Female	60	Elderly group	Lower thoracic	G1	0.447637	1	27
38	35	0	T2	N2	M0	Stage III	LowExpression	Weakly positive	2	2	4	Negative	Negative	No	Male	45	Young group	Mid thoracic	G3	0.622205	1	35
39	16	1	T1	N1	M0	Stage I	HighExpression	Positive	2	3	6	Negative	Negative	Yes	Male	61	Elderly group	Mid thoracic	G1	0.381145	1	28
41	34	1	T2	N1	M0	Stage II	HighExpression	Strong positive	3	3	9	Negative	Negative	Yes	Male	64	Elderly group	Mid thoracic	G1	0.510314	1	29
42	29	1	T2	N0	M0	Stage II	HighExpression	Positive	2	4	8	Positive	Negative	No	Female	55	Young group	Mid thoracic	G1	0.320171	1	30
44	23	1	T2	N1	M0	Stage II	HighExpression	Strong positive	3	4	12	Positive	Positive	Yes	Male	47	Young group	Upper thoracic	G1	0.608509	1	31
45	54	1	T3	N1	M0	Stage III	HighExpression	Positive	2	4	8	Negative	Negative	No	Female	49	Young group	Mid thoracic	G3	0.576431	1	32
46	18	1	T3	N3	M0	Stage IV	LowExpression	Weakly positive	1	1	1	Negative	Positive	No	Male	66	Elderly group	Mid thoracic	G2	0.835701	1	3
49	60	0	T3	N0	M0	Stage II	HighExpression	Positive	2	4	8	Negative	Negative	Yes	Male	53	Young group	Lower thoracic	G3	0.490865	1	33
53	17	1	T2	N2	M0	Stage III	HighExpression	Strong positive	3	3	9	Positive	Positive	No	Male	71	Elderly group	Mid thoracic	G1	0.626215	1	35
54	21	1	T2	N0	M0	Stage II	LowExpression	Weakly positive	2	2	4	Negative	Positive	Yes	Female	55	Young group	Lower thoracic	G2	0.47011	1	40
55	60	0	T1	N1	M0	Stage I	LowExpression	Weakly positive	1	3	3	Negative	Negative	Yes	Male	57	Young group	Lower thoracic	G1	0.372879	1	16
58	14	0	T2	N2	M0	Stage III	LowExpression	Weakly positive	2	2	4	Negative	Negative	No	Female	68	Elderly group	Lower thoracic	G3	0.555252	1	22
60	60	0	T2	N0	M0	Stage II	LowExpression	Weakly positive	1	2	2	Positive	Negative	Yes	Male	54	Young group	Mid thoracic	G1	0.516688	1	39
62	59	1	T2	N1	M0	Stage II	HighExpression	Positive	2	3	6	Negative	Negative	No	Female	43	Young group	Mid thoracic	G1	0.320171	1	36
63	48	1	T3	N2	M0	Stage III	HighExpression	Positive	2	3	6	Positive	Negative	Yes	Female	49	Young group	Upper thoracic	G1	0.794785	1	37
64	41	0	T2	N1	M0	Stage II	LowExpression	Weakly positive	1	3	3	Negative	Negative	Yes	Female	65	Elderly group	Mid thoracic	G3	0.452116	1	27
65	18	0	T1	N0	M0	Stage I	LowExpression	Weakly positive	1	1	1	Negative	Negative	Yes	Male	65	Elderly group	Mid thoracic	G1	0.381145	1	38
66	21	1	T1	N1	M0	Stage I	HighExpression	Positive	2	3	6	Negative	Negative	Yes	Male	68	Elderly group	Mid thoracic	G1	0.381145	1	38
70	46	0	T2	N0	M0	Stage II	LowExpression	Weakly positive	1	2	2	Negative	Negative	Yes	Female	53	Young group	Mid thoracic	G1	0.46904	1	44
71	45	0	T2	N0	M0	Stage II	HighExpression	Positive	2	4	8	Positive	Negative	Yes	Male	46	Young group	Mid thoracic	G1	0.516688	1	39
73	32	1	T2	N0	M0	Stage II	HighExpression	Positive	2	4	8	Positive	Positive	Yes	Female	46	Young group	Lower thoracic	G2	0.47011	1	40
74	30	1	T1	N2	M0	Stage III	HighExpression	Positive	2	3	6	Positive	Positive	No	Female	53	Young group	Lower thoracic	G2	0.587841	1	41
78	60	0	T1	N1	M0	Stage I	LowExpression	Weakly positive	1	3	3	Negative	Positive	Yes	Male	57	Young group	Mid thoracic	G1	0.387182	1	9
79	36	1	T3	N2	M0	Stage III	HighExpression	Strong positive	3	3	9	Positive	Positive	No	Male	45	Young group	Lower thoracic	G2	0.633166	1	42
80	29	1	T2	N1	M0	Stage II	HighExpression	Positive	2	3	6	Positive	Positive	Yes	Female	48	Young group	Lower thoracic	G2	0.47011	1	44
81	54	1	T1	N2	M0	Stage III	LowExpression	Weakly positive	2	2	4	Negative	Negative	No	Female	50	Young group	Lower thoracic	G1	0.572006	1	45
82	18	1	T2	N2	M0	Stage III	HighExpression	Positive	2	4	8	Negative	Negative	No	Female	51	Young group	Mid thoracic	G3	0.576431	1	45
83	29	1	T3	N0	M0	Stage II	LowExpression	Weakly positive	1	2	2	Negative	Negative	Yes	Female	45	Young group	Lower thoracic	G1	0.453954	1	11
84	36	1	T1	N0	M0	Stage I	LowExpression	Weakly positive	1	1	1	Negative	Negative	Yes	Female	50	Young group	Lower thoracic	G3	0.320109	1	30
85	21	1	T3	N0	M0	Stage II	HighExpression	Strong positive	3	4	12	Negative	Positive	Yes	Female	54	Young group	Mid thoracic	G2	0.485256	1	46
86	60	0	T2	N0	M0	Stage II	LowExpression	Weakly positive	1	1	1	Negative	Negative	Yes	Male	64	Elderly group	Lower thoracic	G2	0.511387	1	29
87	25	1	T2	N1	M0	Stage II	HighExpression	Positive	2	3	6	Negative	Negative	Yes	Female	49	Young group	Lower thoracic	G2	0.47011	1	47
90	9	1	T2	N2	M0	Stage III	HighExpression	Positive	2	4	8	Positive	Positive	Yes	Female	44	Young group	Lower thoracic	G3	0.70608	1	48
91	25	1	T2	N3	M0	Stage IV	HighExpression	Strong positive	3	3	9	Negative	Negative	No	Male	51	Young group	Lower thoracic	G1	0.821476	1	49
92	30	1	T2	N2	M0	Stage III	HighExpression	Positive	2	3	6	Positive	Positive	No	Male	55	Young group	Lower thoracic	G2	0.633166	1	50
93	49	1	T2	N1	M0	Stage II	LowExpression	Weakly positive	1	1	1	Negative	Negative	Yes	Male	50	Young group	Upper thoracic	G2	0.623882	1	18
95	20	1	T2	N0	M0	Stage II	HighExpression	Positive	2	3	6	Negative	Negative	Yes	Male	55	Young group	Mid thoracic	G2	0.532898	1	51
96	60	0	T2	N0	M0	Stage II	LowExpression	Weakly positive	2	2	4	Negative	Negative	Yes	Male	59	Young group	Mid thoracic	G2	0.532898	1	51
97	56	0	T1	N1	M0	Stage I	HighExpression	Positive	2	4	8	Negative	Negative	Yes	Male	75	Elderly group	Mid thoracic	G2	0.396592	1	52
98	3	1	T2	N2	M0	Stage III	HighExpression	Strong positive	3	4	12	Positive	Positive	No	Female	65	Elderly group	Mid thoracic	G2	0.596341	1	53
99	44	0	T1	N0	M0	Stage I	LowExpression	Weakly positive	1	2	2	Negative	Negative	Yes	Female	56	Young group	Lower thoracic	G1	0.329453	1	25
103	9	1	T2	N2	M0	Stage III	LowExpression	Weakly positive	2	2	4	Negative	Negative	No	Male	49	Young group	Mid thoracic	G2	0.64715	1	4
104	24	0	T2	N1	M0	Stage II	LowExpression	Weakly positive	2	2	4	Negative	Negative	Yes	Male	63	Elderly group	Upper thoracic	G2	0.617875	1	43
105	33	0	T2	N2	M0	Stage III	LowExpression	Weakly positive	1	2	2	Positive	Negative	Yes	Male	54	Young group	Mid thoracic	G2	0.774784	1	20
107	7	0	T2	N2	M0	Stage III	LowExpression	Weakly positive	1	3	3	Positive	Negative	No	Male	56	Young group	Mid thoracic	G2	0.64715	1	5
108	38	0	T1	N2	M0	Stage III	LowExpression	Weakly positive	1	2	2	Negative	Negative	No	Male	51	Young group	Mid thoracic	G2	0.64715	1	19
109	60	0	T1	N0	M0	Stage I	HighExpression	Strong positive	3	3	9	Negative	Negative	Yes	Male	63	Elderly group	Lower thoracic	G2	0.382159	1	1
113	26	0	T2	N0	M0	Stage II	HighExpression	Strong positive	3	4	12	Positive	Positive	Yes	Male	48	Young group	Upper thoracic	G1	0.608509	1	2
114	25	1	T2	N2	M0	Stage III	LowExpression	Weakly positive	2	2	4	Positive	Positive	No	Male	61	Elderly group	Mid thoracic	G1	0.626215	1	50
118	35	1	T1	N0	M0	Stage I	LowExpression	Weakly positive	2	2	4	Positive	Positive	Yes	Male	61	Elderly group	Mid thoracic	G2	0.396592	1	7
121	7	1	T3	N1	M0	Stage III	HighExpression	Positive	2	3	6	Positive	Positive	No	Male	61	Elderly group	Mid thoracic	G2	0.641301	1	4
123	11	1	T3	N1	M0	Stage III	HighExpression	Positive	2	4	8	Negative	Negative	No	Male	61	Elderly group	Mid thoracic	G2	0.641301	1	5
124	60	0	T1	N0	M0	Stage I	LowExpression	Weakly positive	1	3	3	Negative	Positive	Yes	Male	67	Elderly group	Lower thoracic	G2	0.382159	1	10
125	17	1	T1	N2	M0	Stage III	HighExpression	Strong positive	3	3	9	Negative	Positive	No	Female	57	Young group	Lower thoracic	G2	0.587841	1	6
127	51	0	T1	N0	M0	Stage I	HighExpression	Strong positive	3	4	12	Negative	Positive	Yes	Male	52	Young group	Mid thoracic	G2	0.402714	1	7
130	28	1	T2	N1	M0	Stage II	HighExpression	Strong positive	3	3	9	Positive	Negative	Yes	Male	68	Elderly group	Upper thoracic	G1	0.602414	1	8
131	57	0	T1	N2	M0	Stage III	LowExpression	Weakly positive	1	2	2	Negative	Negative	No	Male	44	Young group	Lower thoracic	G3	0.607831	1	2
134	60	0	T1	N2	M0	Stage III	LowExpression	Weakly positive	1	3	3	Negative	Positive	No	Male	49	Young group	Lower thoracic	G3	0.607831	1	31
137	60	0	T1	N1	M0	Stage I	HighExpression	Positive	2	3	6	Negative	Negative	Yes	Male	59	Young group	Mid thoracic	G1	0.387182	1	9
138	4	1	T1	N1	M0	Stage I	HighExpression	Positive	2	4	8	Negative	Negative	Yes	Male	62	Elderly group	Mid thoracic	G1	0.381145	1	10
139	12	1	T3	N3	M0	Stage IV	LowExpression	Weakly positive	2	2	4	Negative	Negative	No	Male	50	Young group	Lower thoracic	G3	0.815141	1	49
140	60	0	T1	N2	M0	Stage III	HighExpression	Strong positive	3	4	12	Negative	Negative	No	Male	64	Elderly group	Lower thoracic	G2	0.627219	1	12
141	60	0	T1	N2	M0	Stage III	HighExpression	Positive	2	4	8	Negative	Negative	No	Female	50	Young group	Upper thoracic	G2	0.687838	1	13
142	52	1	T1	N1	M0	Stage I	HighExpression	Positive	2	4	8	Negative	Positive	Yes	Male	56	Young group	Lower thoracic	G3	0.36297	1	14
143	44	0	T1	N2	M0	Stage III	LowExpression	Weakly positive	1	1	1	Negative	Negative	No	Female	54	Young group	Lower thoracic	G2	0.587841	1	6
144	40	1	T2	N1	M0	Stage II	LowExpression	Weakly positive	1	1	1	Negative	Negative	Yes	Female	57	Young group	Mid thoracic	G2	0.485256	1	46
145	51	1	T1	N2	M0	Stage III	LowExpression	Weakly positive	1	1	1	Positive	Positive	No	Female	47	Young group	Mid thoracic	G3	0.576431	1	32
146	20	1	T1	N2	M0	Stage III	LowExpression	Weakly positive	2	2	4	Negative	Positive	No	Female	62	Elderly group	Mid thoracic	G2	0.596341	1	53
147	44	1	T2	N1	M0	Stage II	LowExpression	Weakly positive	1	2	2	Positive	Negative	Yes	Male	52	Young group	Upper thoracic	G2	0.623882	1	12
148	44	1	T3	N2	M0	Stage III	LowExpression	Weakly positive	1	2	2	Negative	Negative	No	Female	60	Elderly group	Upper thoracic	G2	0.682333	1	13
150	20	0	T2	N1	M0	Stage II	LowExpression	Weakly positive	1	3	3	Negative	Positive	No	Female	61	Elderly group	Mid thoracic	G1	0.314643	1	36
151	10	1	T1	N0	M0	Stage I	HighExpression	Positive	2	3	6	Negative	Positive	Yes	Female	57	Young group	Lower thoracic	G1	0.329453	1	15
152	42	0	T1	N0	M0	Stage I	HighExpression	Positive	2	4	8	Negative	Negative	Yes	Male	50	Young group	Mid thoracic	G3	0.377121	1	16
155	33	1	T3	N1	M0	Stage III	HighExpression	Strong positive	3	3	9	Positive	Positive	Yes	Male	51	Young group	Lower thoracic	G2	0.764014	1	17
156	29	0	T2	N0	M0	Stage II	LowExpression	Weakly positive	1	3	3	Negative	Negative	Yes	Male	46	Young group	Lower thoracic	G1	0.501517	1	24
157	3	1	T3	N1	M0	Stage III	HighExpression	Strong positive	3	3	9	Negative	Positive	No	Male	70	Elderly group	Lower thoracic	G2	0.627219	1	18
159	21	0	T3	N2	M0	Stage III	HighExpression	Positive	2	3	6	Negative	Negative	No	Male	63	Elderly group	Mid thoracic	G2	0.641301	1	19
163	45	1	T1	N0	M0	Stage I	LowExpression	Weakly positive	1	1	1	Negative	Negative	Yes	Female	70	Elderly group	Lower thoracic	G1	0.323841	1	15
165	60	0	T2	N1	M0	Stage II	LowExpression	Weakly positive	1	3	3	Negative	Negative	Yes	Male	57	Young group	Upper thoracic	G3	0.598313	1	8
166	32	1	T3	N1	M0	Stage III	LowExpression	Weakly positive	2	2	4	Positive	Negative	No	Male	67	Elderly group	Mid thoracic	G1	0.626215	1	42
168	21	1	T1	N2	M0	Stage III	HighExpression	Strong positive	3	3	9	Negative	Positive	Yes	Male	56	Young group	Mid thoracic	G2	0.774784	1	20
