# Supplementary material for: Exploratory analyses of the associations between Ki-67 expression, lymph node metastasis, and prognosis in patients with esophageal squamous cell cancer
Source: PeerJ. 2025 Feb 26;13:e19062. doi: 10.7717/peerj.19062 (PMC11871893; doi:10.7717/peerj.19062)
Supplement: Table S3 [file peerj-13-19062-s003.xlsx]

## Sheet: Sheet 1
Supplementary Table S3. The similarities and differences of several similar studies about Ki-67.
Items or outcomes	Wang et al.[29]	Sasagawa et al.[32]	Zhang et al.[30]	Deng et al.[7]	Wang et al.[31]	Our study
Study type	Retrospective study	Retrospective study	Retrospective study	Retrospective study	Retrospective study	Retrospective study
Sample size	117	49	100	807	240	168
Cut‑off value of Ki-67	0.5	0.35	Staining intensity score and staining positive rate score	0.6	Staining intensity score and staining positive rate score	Staining intensity score and staining positive rate score
Overall survival	Non-Significant	Significant	Non-Significant	Non-Significant correlation	Significant	Significant
Disease‑free survival	-	-	-	Non-Significant correlation	-	-
Progression-Free-Survival	Non-Significant	-	-	-	-	-
Tumor differentiation	-	-	-	Significantly negtive correlation	-	Significant
Lymph node metastasis	-	Significant correlation	-	Significantly positive correlation	-	Significant
Independent prognostic variable	No	-	-	No	Yes	Yes
T stage	-	Non-Significant correlation	-	-	-	Significant
N stage	-	Significant correlation	-	-	-	Significant
Vascular invasion	-	Non-Significant correlation	-	-	-	Significant
Notes: -: not reported.
